# Supplementary material
Source: PubMed Central journal article supplement (PMC4857190)
Supplement: NIHMS781121-supplement-SI.pdf [file NIHMS781121-supplement-SI.pdf]

## Supporting information

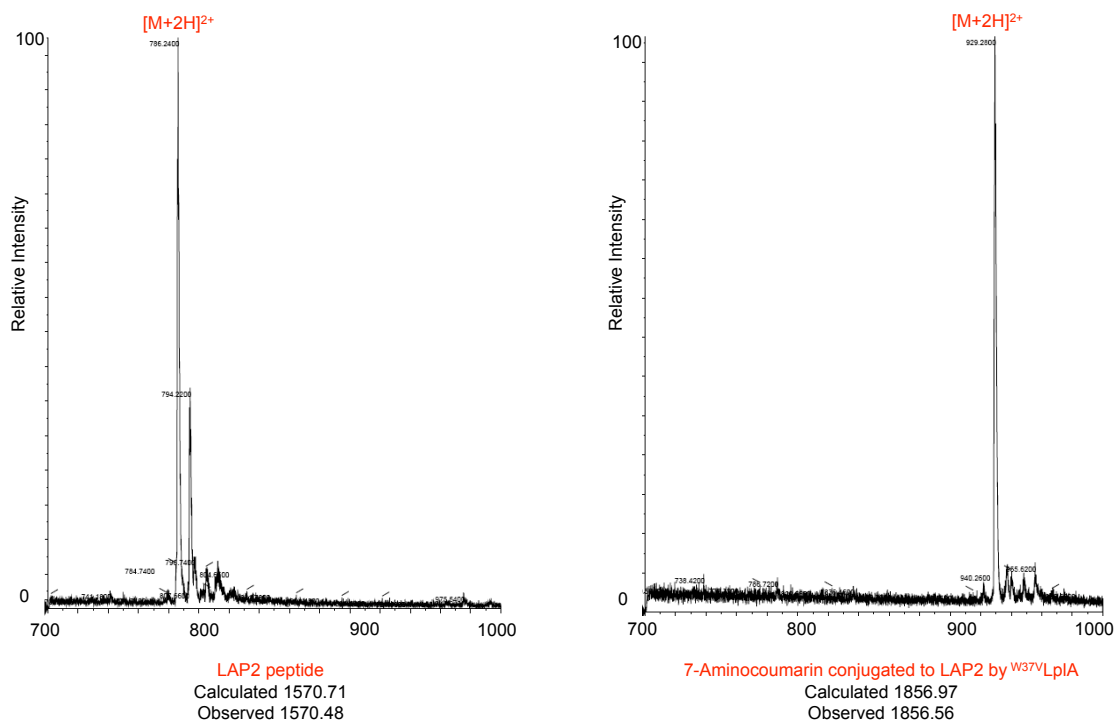

**Figure S1.** ESI mass spectra of the 7-aminocoumarin-LAP conjugate and the LAP starting material (starred peaks in Figure 2C).

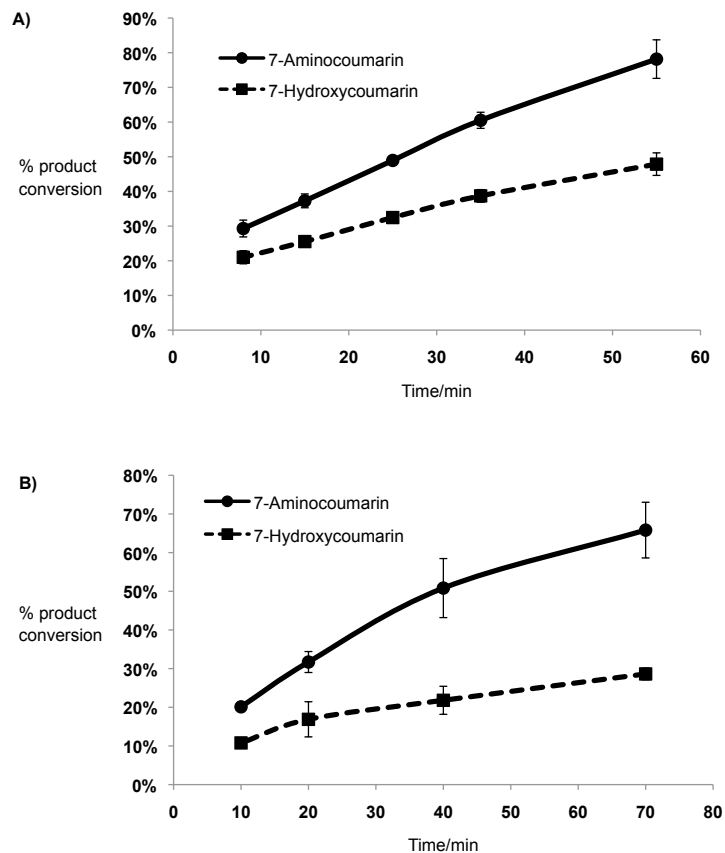

**Figure S2.** Comparison of 7-aminocoumarin and 7-hydroxycoumarin ligation kinetics by  $W^{37V}$ LplA. Either 500  $\mu\text{M}$  of each probe was used (top), or 100  $\mu\text{M}$  of each probe (bottom). Product conversions were measured using HPLC. Measurements were performed in triplicate. Error bars,  $\pm 1$  s.d.

### 7-Aminocoumarin and 7-hydroxycoumarin pH profiles (Figure 2B)

Fluorescence emission was recorded for 150  $\mu$ M solutions, using a TECAN Safire Microplate Reader and a plastic transparent-bottomed 384-well plate (Greiner). pH 3-10 buffers were prepared as the table below. The exact pH values of buffer were measured, and slightly adjusted by using <2mL of 1M HCl or NaOH solution, prior to use.

| pH    | 1M acetic acid solution                 | 1 M sodium acetate solution |                  |
|-------|-----------------------------------------|-----------------------------|------------------|
| pH=3  | 98.2 mL                                 | 1.8 mL                      |                  |
| pH=4  | 84.7 mL                                 | 15.3 mL                     |                  |
| pH=5  | 35.7 mL                                 | 64.3 mL                     |                  |
| pH=6  | 5.2 mL                                  | 94.8 mL                     |                  |
| pH    | 1M disodium hydrogen phosphate solution | 1M HCl solution             | 1M NaOH solution |
| pH=7  | 75.6 mL                                 | 24.4 mL                     | --               |
| pH=8  | 95.5 mL                                 | 4.4 mL                      | --               |
| pH=9  | 95.5 mL                                 | 4.5 mL                      | --               |
| pH=10 | 96.6 mL                                 | --                          | 3.4 mL           |
